# Supplementary material for: The interplay between ceria particle size, reducibility, and ethanol oxidation activity of ceria-supported gold catalysts
Source: Royal Society of Chemistry journal article supplement (doi:10.1039/c7re00175d), 2018-01-01
Supplement: c7re00175d1.pdf [file c7re00175d1.pdf]

## SUPPORTING INFORMATION

*for*

### The interplay between ceria particle size, reducibility, and activity for the selective oxidation of ethanol with ceria-supported gold catalysts

*Gregory M. Mullen<sup>†</sup>, Edward J. Evans Jr.<sup>§</sup>, Benjamin C. Siegert<sup>†</sup>, Nathaniel R. Miller<sup>‡</sup>, Duan*

*Zhiyao<sup>§</sup>, Benjamin K. Rosselet<sup>†</sup>, Iliya Sabzevari<sup>†</sup>, Adrianna Brush<sup>†</sup>, Graeme Henkelman<sup>§</sup>, and C.*

*Buddie Mullins<sup>†‡§\*</sup>*

<sup>†</sup>McKetta Department of Chemical Engineering, The University of Texas at Austin, Austin,  
Texas 78712, United States

<sup>‡</sup>Texas Materials Institute, The University of Texas at Austin, Austin, Texas 78712, United  
States

<sup>‡</sup>Department of Geosciences, Jackson School of Geosciences, University of Texas at Austin,  
Austin, TX 78712, United States

<sup>§</sup>Department of Chemistry, The University of Texas at Austin, Austin, Texas 78712, United  
States

1. XRD spectra of ceria supports prior to gold deposition

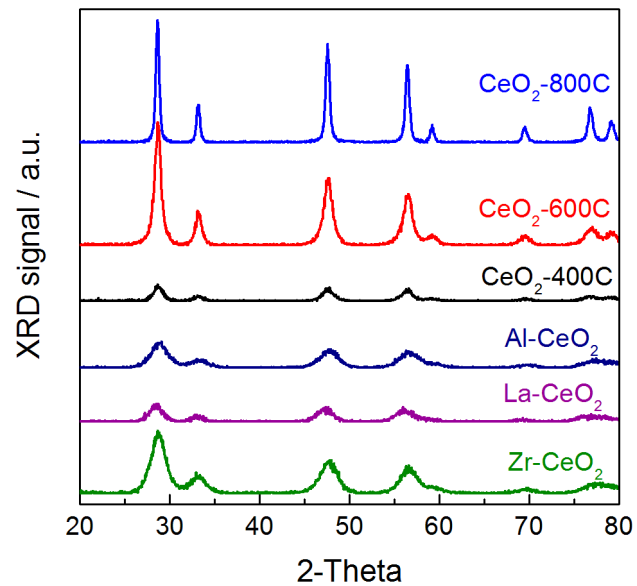

**Figure S1.** XRD spectra of ceria supports prior to gold deposition.

**2. Representative STEM images of ceria supports prior to gold deposition and histograms of ceria particle size from STEM image analysis**

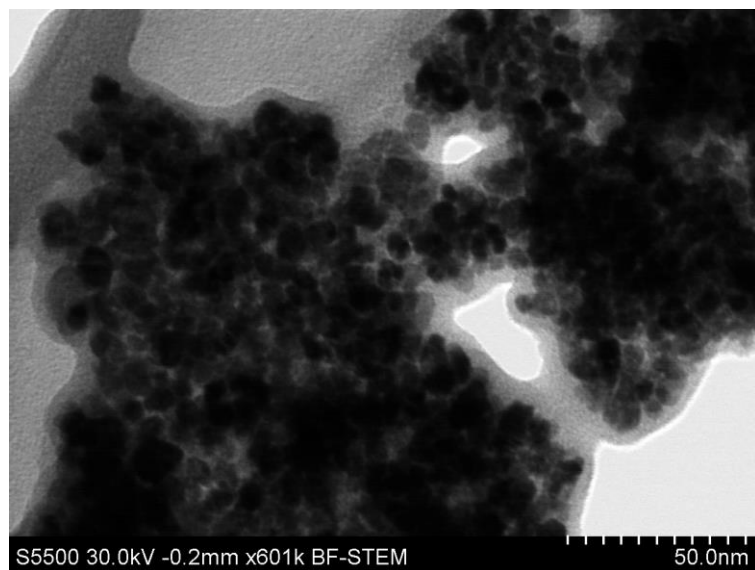

**Figure S2.** STEM image of CeO<sub>2</sub>-400C

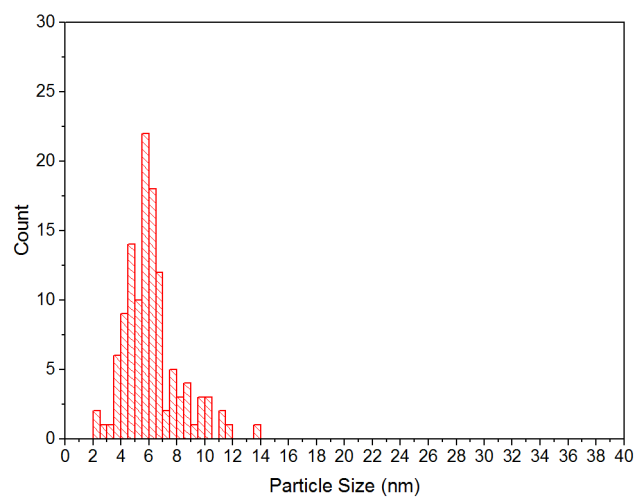

**Figure S3.** Histogram of particle size distribution for CeO<sub>2</sub>-400C

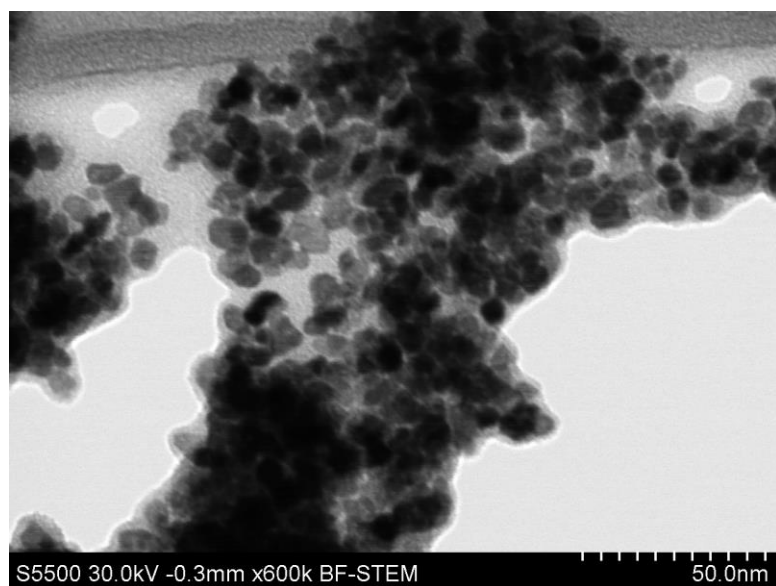

**Figure S4.** STEM image of CeO<sub>2</sub>-600C

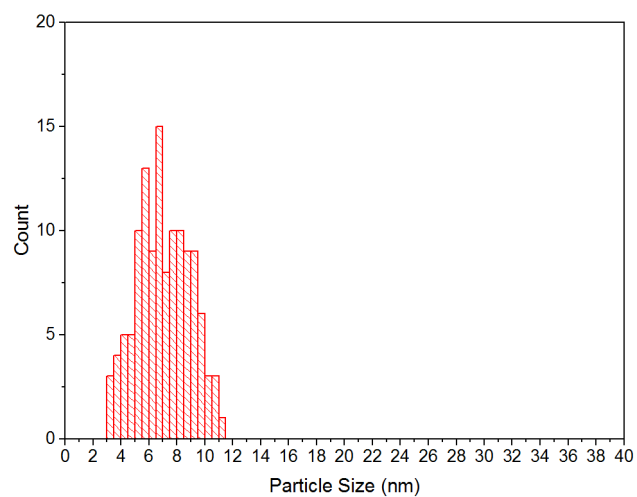

**Figure S5.** Histogram of particle size distribution for CeO<sub>2</sub>-600C

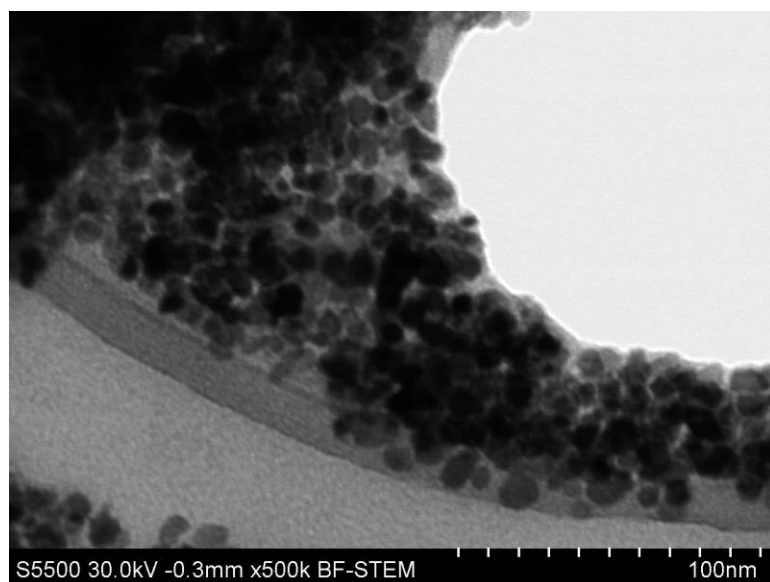

**Figure S6.** STEM image of CeO<sub>2</sub>-800C

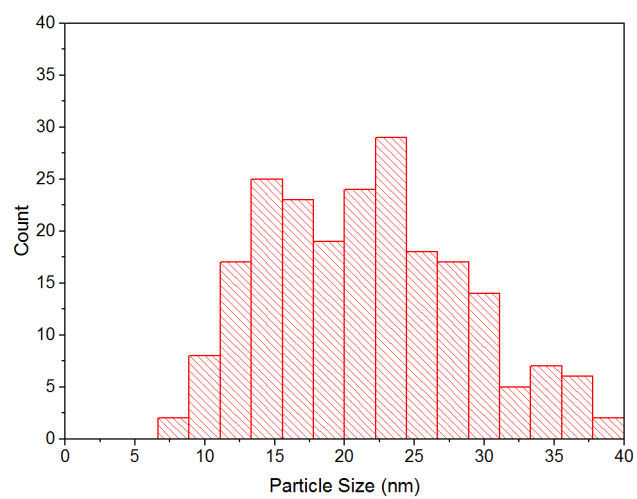

**Figure S7.** Histogram of particle size distribution for CeO<sub>2</sub>-800C

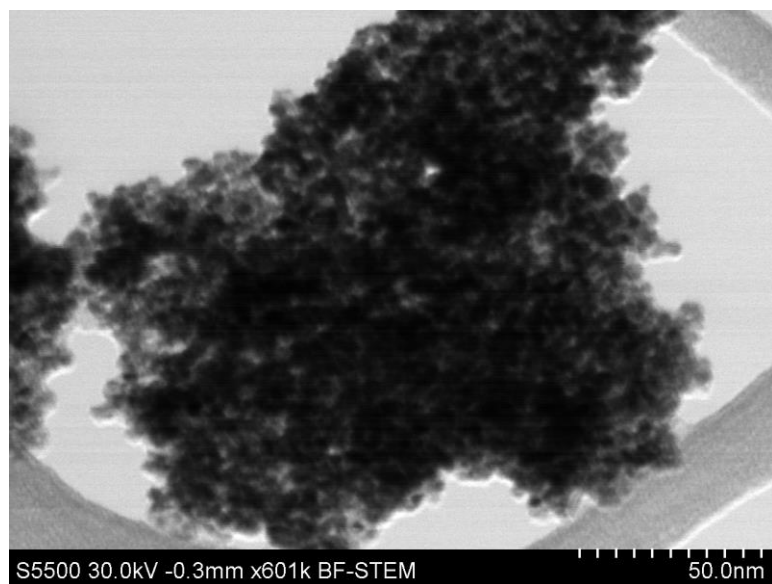

**Figure S8.** STEM image of Al-CeO<sub>2</sub>

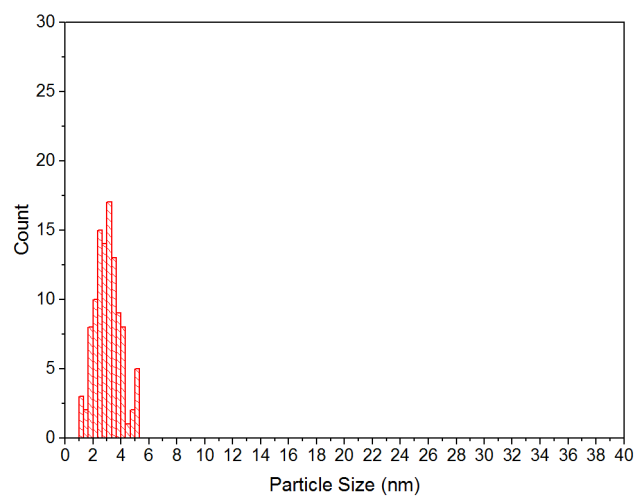

**Figure S9.** Histogram of particle size distribution for Al-CeO<sub>2</sub>

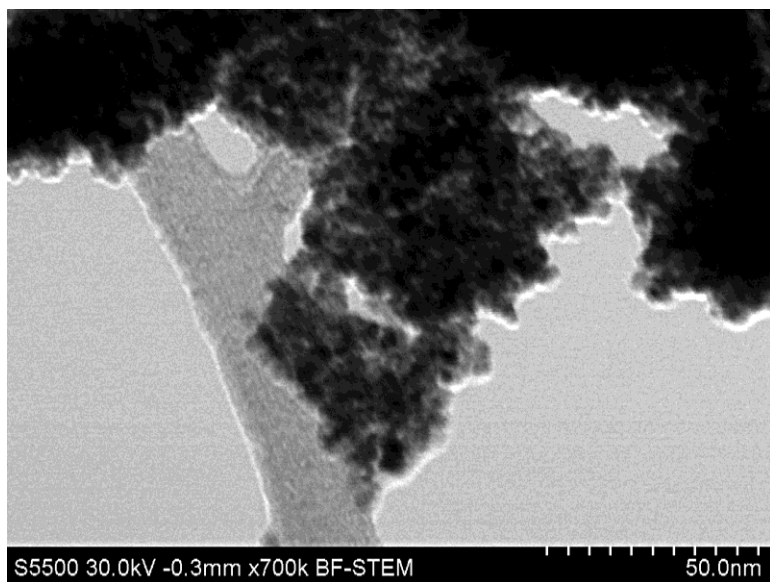

**Figure S10.** STEM image of La-CeO<sub>2</sub>

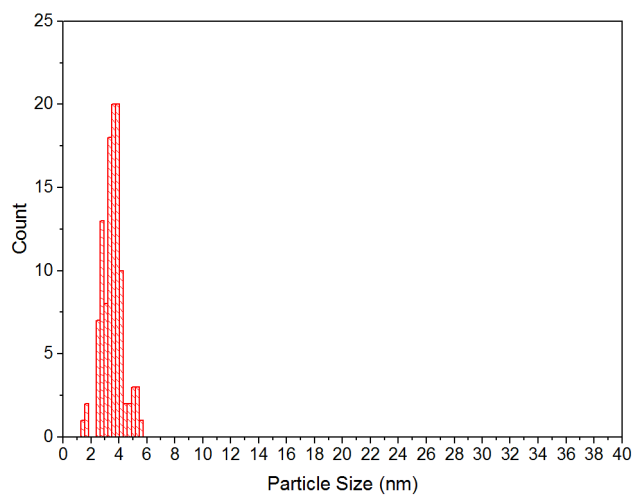

**Figure S11.** Histogram of particle size distribution for La-CeO<sub>2</sub>

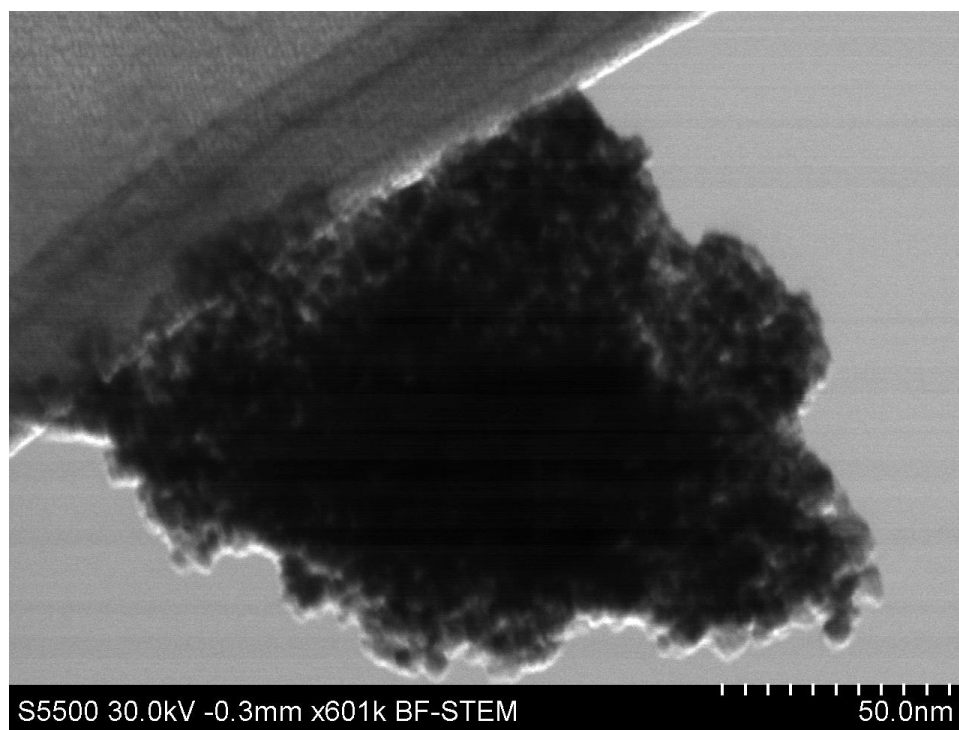

**Figure S12.** STEM image of Zr-CeO<sub>2</sub>

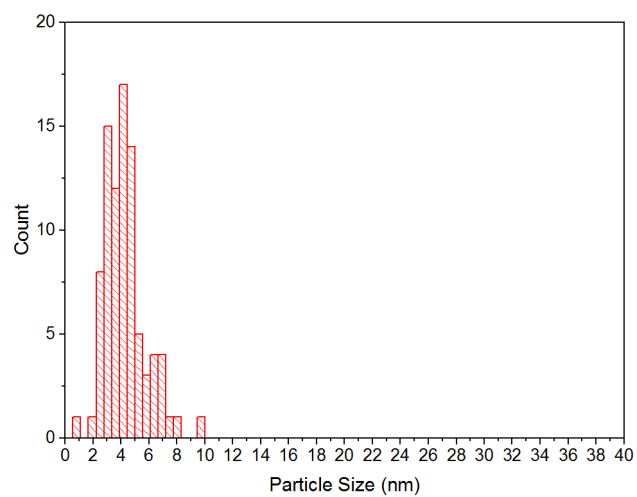

**Figure S13.** Histogram of particle size distribution for Zr-CeO<sub>2</sub>



### 3. Analysis of Ce 3d XPS spectra for determination of Ce<sup>3+</sup> species by method of Le Normand et al.

To quantitatively assess the amount of Ce<sup>3+</sup> in the XPS spectrum for each Au/CeO<sub>2</sub> catalyst, we employed the method of Le Normand et al.,<sup>1</sup> which estimates the v''' peak area by measuring the u''' peak area and taking the ratio of v''' [ $\frac{3}{2} I(u''') = I(v''')$ ] to the total area of the Ce 3d 5/2 peaks. The u''' peak does not overlap with other peaks in the 3d region and the v<sub>0</sub>, v, v' and v'' peaks do not overlap with any of the 3d 3/2 peaks, therefore the area of the u''' the total area of the v<sub>0</sub>, v, v' and v'' peaks can be measured unambiguously. By calculating v''' from the area of u''' and dividing this value by the total area of the 3d 5/2 features [ $I(v''') + I(v_0, v, v', v'')$ ], a less ambiguous metric for analysis of changes to the concentration of Ce<sup>4+</sup> in the material is obtained. This ratio equals 0.32 for pure CeO<sub>2</sub> and decreases as the amount of Ce<sup>3+</sup> in the material increases.<sup>1</sup> The equation for this calculation is shown here:

$$\frac{I(v''')}{I(3d \frac{5}{2})} = \frac{\frac{3}{2} I(u''')}{\frac{3}{2} I(u''') + I(v_0, v, v', v'')}$$

**Table S1.** Ratios of v''' area to total area of features in the Ce 3d 5/2 XPS region

| Sample                    | I(v''')/I(3d 5/2) |
|---------------------------|-------------------|
| Au/CeO <sub>2</sub> -400C | 0.32              |
| Au/CeO <sub>2</sub> -600C | 0.32              |
| Au/CeO <sub>2</sub> -800C | 0.33              |
| Au/Al-CeO <sub>2</sub>    | 0.34              |
| Au/La-CeO <sub>2</sub>    | 0.31              |
| Au/Zr-CeO <sub>2</sub>    | 0.32              |

#### 4. BET surface area versus H<sub>2</sub> consumption from TPR for ceria support materials

To assess the correlation between surface area and H<sub>2</sub> consumption for the ceria support materials, for each material we plotted the specific surface area as determined by BET analysis against the specific H<sub>2</sub> consumption determined by integration of TPR patterns. We observed a strong correlation between surface area and H<sub>2</sub> consumption for the CeO<sub>2</sub>-800C, CeO<sub>2</sub>-600C, CeO<sub>2</sub>-400C, and Zr-CeO<sub>2</sub> supports. The Al-CeO<sub>2</sub> and La-CeO<sub>2</sub> supports each exhibited lower H<sub>2</sub> consumption values per unit surface area.

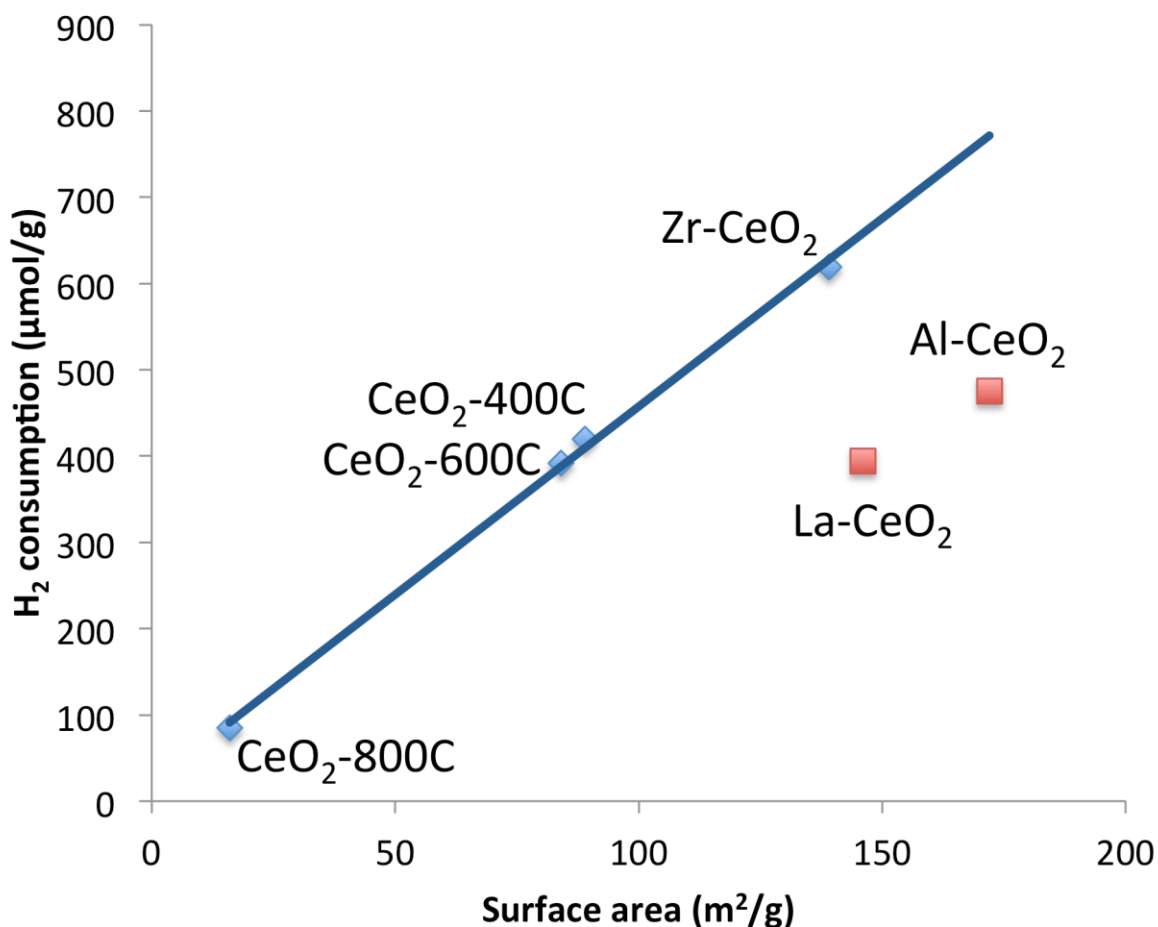

**Figure S16.** Plot of specific H<sub>2</sub> consumption versus specific surface area of the support materials

## 5. Calculation of the percent reduction of surface capping oxygen during H<sub>2</sub>-TPR of Au/CeO<sub>2</sub> catalysts.

We calculated the atomic density of oxygen at the surface of the CeO<sub>2</sub> particles assuming that the surface consisted entirely of the CeO<sub>2</sub>(111) facet. Ceria nanoparticles generally consist of octahedral and truncated octahedral particles predominantly exposing the (111) facet, which has the highest stability.<sup>2</sup> Using the lattice parameter of CeO<sub>2</sub>, we calculated the surface density of oxygen of the (111) surface to be 1.31x10<sup>-5</sup> mol. atoms/m<sup>2</sup>. By multiplying this density by the specific surface area of each catalyst, we obtained the amount of surface capping oxygen per gram of material. Integrating the reduction features in the TPR spectra provided the specific amount of H<sub>2</sub> consumed by the material. Assuming that each mol. of H<sub>2</sub> reduced one mol. of surface oxygen, we calculated the percent of capping oxygen that would have been reduced during the TPR process. The calculation was conducted as follows:

$$\% \text{ reduction surface O} = \frac{X_{H_2}}{\rho_{O,surf} * SA}$$

X<sub>H2</sub> = H<sub>2</sub> consumption during TPR [mol]

ρ<sub>O,surf</sub> = surface density of oxygen on CeO<sub>2</sub> crystallites [1.31x10<sup>-5</sup> mol/m<sup>2</sup>]

SA = specific surface area of material [m<sup>2</sup>/g]

## 6. Ethanol conversion data

**Table S2.** Ethanol conversion data for each catalyst tested in study

| Sample                    | % conv.<br>ethanol | Stdev |
|---------------------------|--------------------|-------|
| Au/CeO <sub>2</sub> -400C | 6.57%              | 0.01% |
| Au/CeO <sub>2</sub> -600C | 3.61%              | 0.37% |
| Au/CeO <sub>2</sub> -800C | 0.44%              | 0.10% |
| Au/Al-CeO <sub>2</sub>    | 10.13%             | 0.16% |
| Au/La-CeO <sub>2</sub>    | 9.58%              | 0.14% |
| Au/Zr-CeO <sub>2</sub>    | 7.17%              | 0.00% |

## 7. Mears' criterion and the Weisz-Prater criterion for each catalyst during ethanol oxidation

### *Mears Criterion for External Mass Transfer*

To gauge the relative effects of external mass transfer, we calculated the Mears Criterion for each catalyst under the steady state reaction conditions. External mass transfer effects can be neglected if the following criterion is met:

$$\frac{-r_A' r_b R n}{k_c C_{Ab}} < 0.15$$

$r_A'$  – rate of reaction

$\rho_b$  – bulk density of catalyst bed

$R$  – radius of catalyst pellet

$n$  – reaction order in ethanol

$k_c$  – mass transfer coefficient

$C_{Ab}$  – bulk concentration of ethanol

The Reynolds number is low, therefore  $k_c$  can be estimated from Sherwood number

$$Sh = k_c * 2R / D_e = 2$$

$D_e$  – effective diffusivity of ethanol in air

### ***Mears Criterion for External Heat Transfer***

To gauge the relative effects of external heat transfer, we calculated the Mears Criterion for each catalyst under the steady state reaction conditions. External heat transfer effects can be neglected if the following criterion is met:

$$\left| \frac{-\Delta H_r (-r_A') r_b R E}{h_i T_b^2 R_g} \right| < 0.15$$

$\Delta H_r$  – enthalpy change of reaction

$r_A'$  – rate of reaction

$\rho_b$  – bulk density of catalyst bed

$R$  – radius of catalyst pellet

$E$  – activation energy

$h$  – heat transfer coefficient

$T_b$  – reaction temperature

$R_g$  – gas constant

Reynolds number was low for our system, therefore we the heat transfer coefficient ( $h$ ) estimated using the Nusselt number

$$Nu = h \cdot 2R / k_t = 2$$

$k_t$  – thermal conductivity of reactant mixture (assumed to be air at 353 K)

### ***Weisz-Prater Criterion for Internal Diffusion***

To gauge the relative effects of external heat transfer, we calculated the Weisz-Prater Criterion for each catalyst under the steady state reaction conditions. Internal diffusion effects can be neglected if the following criterion is met:

$$C_{WP} = \frac{-r'_{A(obs)} r_c R^2}{D_e C_{As}} < 1$$

$r_{A(obs)}$  – rate of reaction

$\rho_c$  – solid density of catalyst bed

$R$  – radius of catalyst pellet

$D_e$  – effective diffusivity of ethanol in air

$C_{As}$  – surface concentration of ethanol

**Table S3.** Mears and Weisz-Prater coefficients associated with acetaldehyde production for each catalyst

| Catalyst                  | Mears (mass transfer) | Weisz-Prater | Mears (heat transfer) |
|---------------------------|-----------------------|--------------|-----------------------|
| Au/CeO <sub>2</sub> -400C | 6.96E-02              | 1.24E-01     | 1.51E-02              |
| Au/CeO <sub>2</sub> -600C | 6.84E-03              | 2.10E-01     | 2.48E-02              |
| Au/CeO <sub>2</sub> -800C | 8.80E-04              | 3.38E-02     | 3.52E-03              |
| Au/Al-CeO <sub>2</sub>    | 1.42E-01              | 2.54E-01     | 3.08E-02              |
| Au/La-CeO <sub>2</sub>    | 1.29E-01              | 2.15E-01     | 2.55E-02              |
| Au/Zr-CeO <sub>2</sub>    | 1.25E-01              | 1.92E-01     | 2.15E-02              |

## 8. Correlation between ethanol oxidation activity and surface area and between ethanol oxidation activity and H<sub>2</sub> consumption

We performed linear regression analysis to assess the correlation between H<sub>2</sub> consumption and acetaldehyde production activity and specific surface area and acetaldehyde production activity for the catalysts. The correlation between H<sub>2</sub> consumption and activity is stronger, as shown in Figure S16. This correlation strength becomes even more pronounced when the outlying point associated with the Au/CeO<sub>2</sub>-800C catalyst is discarded, as shown in Figure S17.

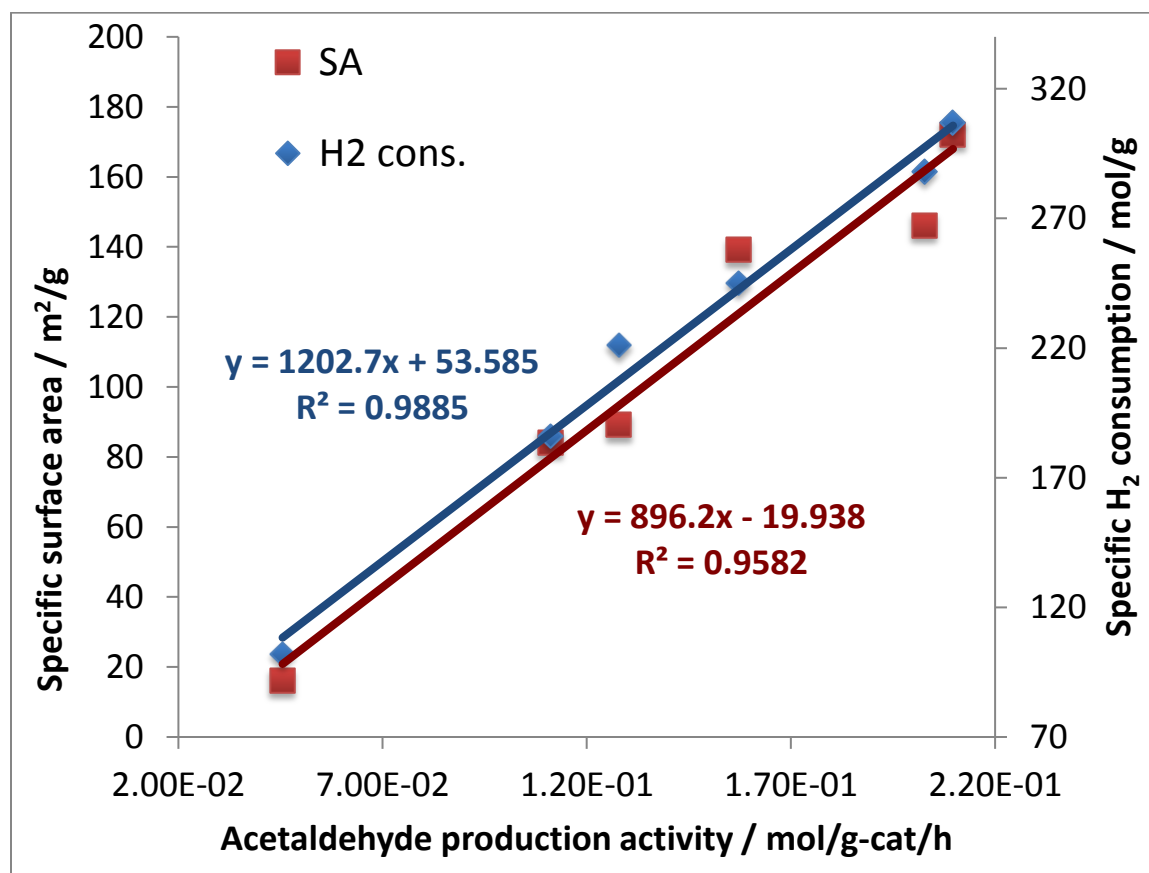

**Figure S17.** Results from linear regression of ethanol oxidation activity versus specific H<sub>2</sub> consumption of the catalysts and oxidation activity versus ethanol specific surface area.



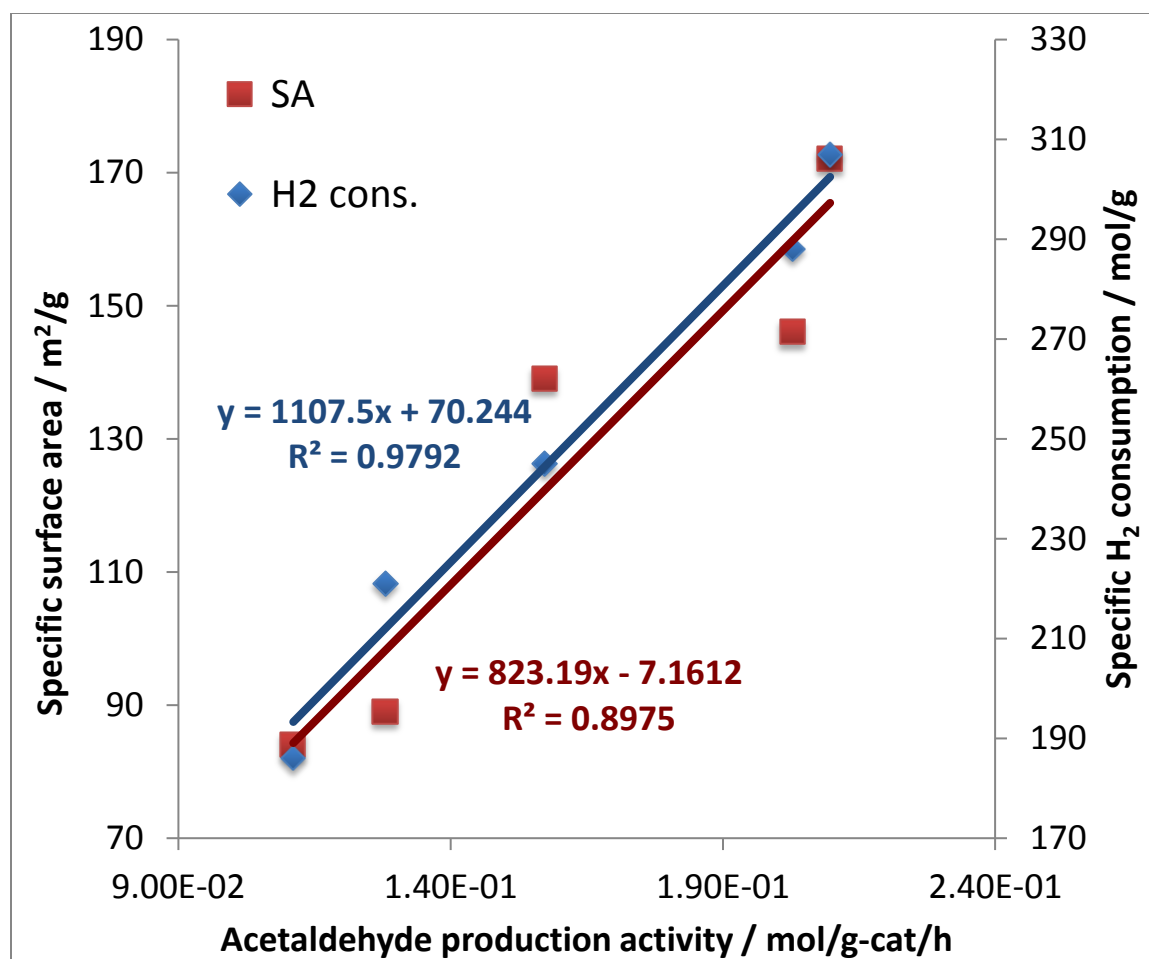

**Figure S18.** Results from linear regression of ethanol oxidation activity versus specific H<sub>2</sub> consumption of the catalysts and oxidation activity versus ethanol specific surface area after removal of outlying data points for Au/CeO<sub>2</sub>-800C.

## References

- 1 F. Le Normand, L. Hilaire, K. Kili, G. Krill and G. Maire, *J. Phys. Chem.*, 1988, **92**, 2561–2568.
- 2 D. Zhang, X. Du, L. Shi and R. Gao, *Dalt. Trans.*, 2012, **41**, 14455.
